# Supplementary material for: Highly doped silicon nanowires by monolayer doping
Source: Royal Society of Chemistry journal article supplement (doi:10.1039/c6nr07623h), 2017-01-01
Supplement: c6nr07623h1.pdf [file c6nr07623h1.pdf]

## Supplementary information

### Highly doped silicon nanowires by monolayer doping

Janneke Veerbeek, Liang Ye, Wouter Vijeelaar, Tibor Kudernac, Wilfred G. van der Wiel, Jurriaan Huskens

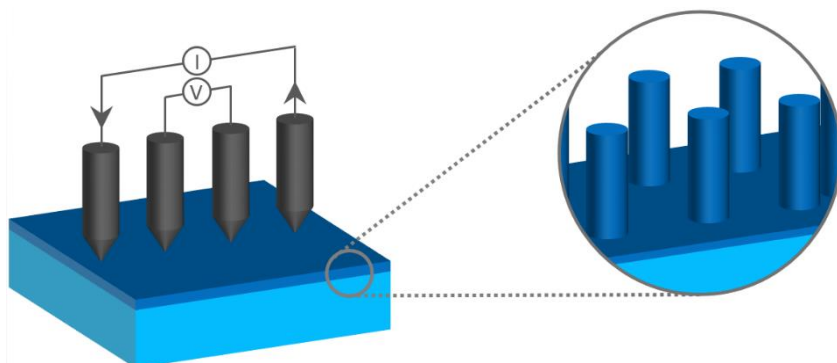

Figure S1. Schematic of the four-point probe set-up to measure the resistivity of the nanowire samples.

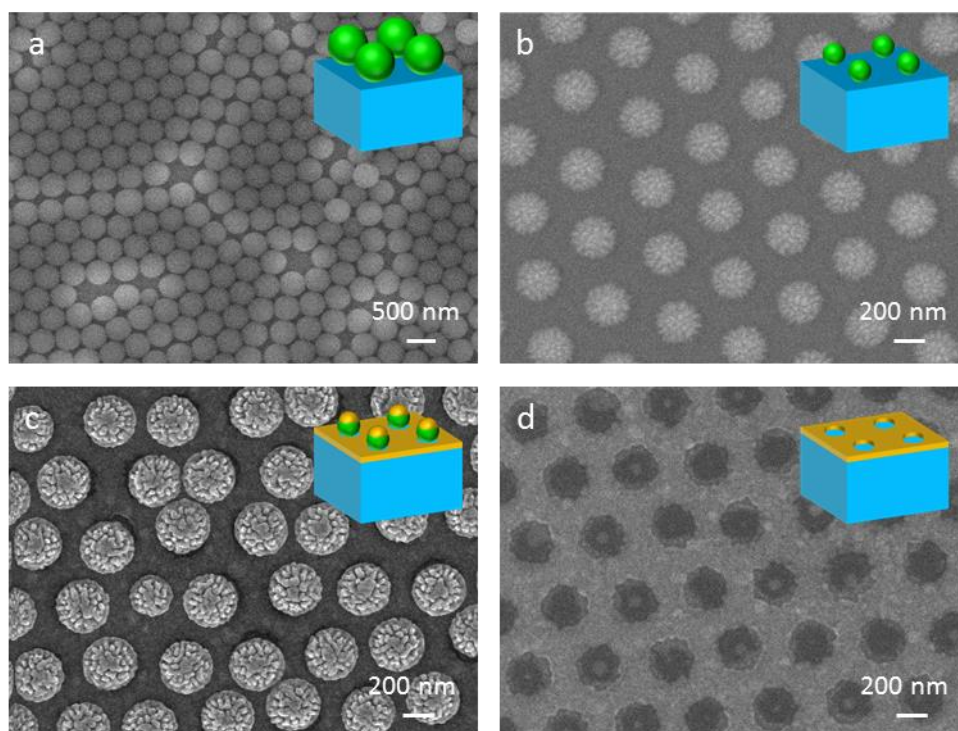

Figure S2. Top-view HR-SEM images of samples resulting from nanosphere lithography, including a) close-packed array formation of polystyrene spheres, b) diameter decrease by oxygen reactive-ion etching, c) silver sputtering on top, d) lift-off of polystyrene spheres.
